# Supplementary material for: Functional microscale single-phase white emission lanthanide MOF for tunable fluorescent sensing and water quality monitoring
Source: Royal Society of Chemistry journal article supplement (doi:10.1039/c8tc05968c), 2019-01-01
Supplement: c8tc05968c1.pdf [file c8tc05968c1.pdf]

## Electronic Supplementary Information

### **Functional Microscale Single-phase White Emission Lanthanide MOF for Tunable Fluorescent Sensing and Water Quality Monitoring**

*Tiancheng Sun, Ping Wang, Ruiqing Fan\*, Wei Chen, Sue Hao and Yulin Yang\**

T. Sun, P. Wang, Prof. R. Fan, W. Chen, S. Hao and Prof. Y. Yang  
MIIT Key Laboratory of Critical Materials Technology for New Energy Conversion and Storage, School of Chemistry and Chemical Engineering, Harbin Institute of Technology, Harbin 150001, P. R. China

## Contents

|                                                                 |    |
|-----------------------------------------------------------------|----|
| Section 1. Experimental Section .....                           | 3  |
| Section 2. Structural Information. ....                         | 12 |
| Section 3. Crystal structure characterizations of Ln-MOFs. .... | 17 |
| Section 4. The Fluorescence performance of Ln-MOFs. ....        | 18 |
| Section 5. Fluorescent Response Mechanism. ....                 | 19 |
| Section 6. The Detection for Formol.....                        | 22 |
| Section 7. 3D Decoded Map.....                                  | 24 |
| Section 8. The Detection for $\text{VO}_4^{3-}$ . ....          | 25 |
| Section 9. Boolean logic operation.....                         | 28 |

## Section 1. Experimental Section

### Materials and Methods

All chemicals for the syntheses were commercially available reagents of analytical grade and were used without further purification. IR spectra were obtained from KBr pellets using a Nicolet Avatar-360 infrared spectrometer in the 4000–400  $\text{cm}^{-1}$  region. Elemental analyses were performed on a PerkinElmer 240c element analyzer. Concentrations of Eu, Tb and Gd were determined by using a ThermoScientific XSERIES 2 inductively coupled plasma-mass spectrometry (ICP-MS) system. The thermal analyses were performed on a ZRY-2P thermogravimetric analyzer from 30 °C to 700 °C with a heating rate of 10 °C  $\text{min}^{-1}$  under air. UV-vis spectra were obtained on a Perkin-Elmer Lambda 20 spectrometer. Scan electron microscope (SEM) images were recorded by Rili SU 8000HSD Series Hitachi New Generation Cold Field Emission SEM. XPS experiments were carried out on a RBD upgraded PHI-5000C ESCA system (Perkin Elmer) with Mg  $K\alpha$  radiation ( $h\nu = 1253.6$  eV). Powder X-ray diffraction (PXRD) patterns were recorded in the  $2\theta$  range of 5°–50° using Cu- $K\alpha$  radiation with a Shimadzu XRD-6000 X-ray diffractometer. The simulation of PXRD pattern was carried out using the single-crystal data and diffraction-crystal module of the Mercury (Hg) program version 3.0. All the fluorescence measurements were recorded on an Edinburgh FLS 920 fluorescence spectrometer in the range of 380–750 nm. The quantum yields (QY) of solid samples were measured in the same instrument using the absolute method with a G8 integration sphere (GMP SA, Switzerland) covered by Spectralone in the same

instrument. All QY measurements were performed in triplicate and averaged. Time-resolved fluorescence decay curves of coordination polymers are well fitted into a mono-exponential function:  $I = I_0 + A \exp(-t/\tau)$ , where  $I$  and  $I_0$  are the luminescent intensities at time  $t = t$  and  $t = 0$ , whereas  $\tau$  is defined as the luminescent lifetime, and a biexponential function:  $I = I_0 + A_1 \exp(-t/\tau_1) + A_2 \exp(-t/\tau_2)$ , where  $I$  and  $I_0$  are the luminescent intensities at time  $t = t$  and  $t = 0$ , respectively, whereas  $\tau_1$  and  $\tau_2$  are defined as the luminescent lifetimes, the average lifetime  $\langle\tau\rangle$  was calculated

according to the following equation:  $\langle\tau\rangle = \frac{\tau_1^2 A_1 \% + \tau_2^2 A_2 \%}{\tau_1 A_1 \% + \tau_2 A_2 \%}$ .

#### Syntheses of $\{[\text{Nd}(\text{DPON})(\text{H}_2\text{O})_2] \cdot (\text{H}_2\text{O})\}_n$ (**1-Nd**)

A mixture of  $\text{Nd}(\text{NO}_3)_3 \cdot 6\text{H}_2\text{O}$  (0.05 mmol, 21.9 mg),  $\text{H}_3\text{DPON}$  (0.1 mmol, 30.3 mg) and 6 mL of the mixed solvent of deionized water and DMF (4:2) was placed in a Teflon reactor (20 mL). After stirred for 30 min in air, the pH of the reaction mixture was adjusted to 4.0 by  $\text{HNO}_3$ , then heated at 120 °C for 3 h. The mixture was gradually cooled to room temperature at a rate of 5 °C h<sup>-1</sup>, purple flake crystals of **1-Nd** were collected and washed with distilled water and then dried under atmosphere (yield 93% based on Nd (III)). Anal. Calcd for  $\text{C}_{14}\text{H}_{12}\text{NdNO}_{10}$  (%): C, 33.73%; H, 2.43%; N, 2.81%. Found: C, 33.71%; H, 2.43%; N, 2.82%. IR (KBr pellet, cm<sup>-1</sup>): 3461 (w), 1538 (vs), 1384 (vs), 1300 (s), 1260 (s), 1240 (s), 1209 (s), 1155 (m), 1104 (w), 1060 (w), 1023 (m), 969 (w), 893 (vw), 849 (w), 788 (s), 672 (w), 631 (w), 556 (vw), 502 (vw), 477 (vw), 424 (m), 416 (m), 406 (m).

#### Syntheses of $\{[\text{Sm}(\text{DPON})(\text{H}_2\text{O})_2] \cdot (\text{H}_2\text{O})\}_n$ (**2-Sm**)

The procedure for coordination polymer **2-Sm** was similar to that of coordination

polymer **1-Nd** except  $\text{Sm}(\text{NO}_3)_3 \cdot 6\text{H}_2\text{O}$  (0.05 mmol, 22.2 mg) was used instead of  $\text{Nd}(\text{NO}_3)_3 \cdot 6\text{H}_2\text{O}$ . Colorless flake crystals of **2-Sm** were collected and washed with distilled water and then dried under atmosphere (yield 95% based on Sm(III)). Anal. Calcd for  $\text{C}_{14}\text{H}_{12}\text{SmNO}_{10}$  (%): C, 33.32%; H, 2.40%; N, 2.78%. Found: C, 33.33%; H, 2.40%; N, 2.76%. IR (KBr pellet,  $\text{cm}^{-1}$ ): 3489 (w), 1541 (vs), 1383 (vs), 1301 (s), 1262 (s), 1241 (s), 1211 (s), 1155 (m), 1114 (vw), 1079 (vw), 1025 (m), 971 (w), 931 (vw), 900 (vw), 884 (w), 851 (m), 836 (s), 812 (s), 788 (s), 687 (m), 672 (m), 631 (m), 558 (w), 478 (w), 453 (m), 434 (m), 422 (s), 404 (s).

#### **Syntheses of $\{[\text{Eu}(\text{DPON})(\text{H}_2\text{O})_2] \cdot (\text{H}_2\text{O})\}_n$ (**3-Eu**)**

The procedure for coordination polymer **3-Eu** was similar to that of coordination polymer **1-Nd** except  $\text{Eu}(\text{NO}_3)_3 \cdot 6\text{H}_2\text{O}$  (0.05 mmol, 22.3 mg) was used instead of  $\text{Nd}(\text{NO}_3)_3 \cdot 6\text{H}_2\text{O}$ . Colorless flake crystals of **3-Eu** were collected and washed with distilled water and then dried under atmosphere (yield 93% based on Eu(III)). Anal. Calcd for  $\text{C}_{14}\text{H}_{12}\text{EuNO}_{10}$  (%): C, 33.22%; H, 2.39%; N, 2.77%. Found: C, 33.25%; H, 2.39%; N, 2.76%. IR (KBr pellet,  $\text{cm}^{-1}$ ): 3484 (w), 1541 (vs), 1379 (vs), 1300 (vs), 1261 (s), 1240 (s), 1211 (s), 1155 (m), 1138 (m), 1116 (w), 1079 (vw), 1025 (m), 972 (w), 931 (vw), 883 (w), 851 (m), 835 (m), 812 (m), 787 (s), 687 (w), 672 (w), 631 (m), 602 (w), 577 (w), 557 (w), 470 (w), 454 (w), 440 (w), 423 (m), 410 (m), 404 (w).

#### **Syntheses of $\{[\text{Gd}(\text{DPON})(\text{H}_2\text{O})_2] \cdot (\text{H}_2\text{O})\}_n$ (**4-Gd**)**

The procedure for coordination polymer **4-Gd** was similar to that of coordination polymer **1-Nd** except  $\text{Gd}(\text{NO}_3)_3 \cdot 6\text{H}_2\text{O}$  (0.05 mmol, 22.6 mg) was used instead of  $\text{Nd}(\text{NO}_3)_3 \cdot 6\text{H}_2\text{O}$ . Colorless flake crystals of **4-Gd** were collected and washed with

distilled water and then dried under atmosphere (yield 96% based on Gd(III)). Anal. Calcd for  $C_{14}H_{12}GdNO_{10}$  (%): C, 32.87%; H, 2.36%; N, 2.74%. Found: C, 32.85%; H, 2.36%; N, 2.75%. IR (KBr pellet,  $cm^{-1}$ ): 3488 (w), 1537 (vs), 1383 (vs), 1300 (vs), 1262 (s), 1240 (s), 1215 (s), 1155 (m), 1137 (m), 1115 (w), 1080 (w), 1024 (m), 973 (w), 932 (vw), 901 (vw), 884 (w), 862 (m), 854 (m), 836 (s), 812 (s), 787 (s), 688 (m), 673 (m), 654 (w), 631 (m), 602 (w), 578 (w), 558 (w), 538 (w), 478 (w), 458 (m), 443 (m), 428 (m), 415 (s).

#### **Syntheses of $\{[Tb(DPON)(H_2O)_2] \cdot (H_2O)\}_n$ (**5-Tb**)**

The procedure for coordination polymer **5-Tb** was similar to that of coordination polymer **1-Nd** except  $Tb(NO_3)_3 \cdot 6H_2O$  (0.05 mmol, 22.7 mg) was used instead of  $Nd(NO_3)_3 \cdot 6H_2O$ . Colorless flake crystals of **5-Tb** were collected and washed with distilled water and then dried under atmosphere (yield 94% based on Tb(III)). Anal. Calcd for  $C_{14}H_{12}TbNO_{10}$  (%): C, 32.77%; H, 2.36%; N, 2.73%. Found: C, 32.78%; H, 2.36%; N, 2.74%. IR (KBr pellet,  $cm^{-1}$ ): 3491 (w), 1541 (vs), 1386 (vs), 1300 (s), 1262 (s), 1241 (s), 1210 (m), 1156 (m), 1138 (m), 1115 (w), 1080 (w), 1026 (m), 972 (w), 932 (w), 902 (vw), 884 (w), 863 (m), 854 (m), 836 (s), 813 (s), 788 (s), 687 (m), 673 (m), 654 (w), 632 (m), 604 (w), 577 (w), 560 (w), 540 (vw), 481 (w), 456 (m), 429 (m), 420 (m), 416 (m), 406 (m).

#### **Syntheses of $\{[Dy(DPON)(H_2O)_2] \cdot (H_2O)\}_n$ (**6-Dy**)**

The procedure for coordination polymer **6-Dy** was similar to that of coordination polymer **1-Nd** except  $Dy(NO_3)_3 \cdot 6H_2O$  (0.05 mmol, 22.9 mg) was used instead of  $Nd(NO_3)_3 \cdot 6H_2O$ . Colorless flake crystals of **6-Dy** were collected and washed with

distilled water and then dried under atmosphere (yield 95% based on Dy(III)). Anal. Calcd for  $C_{14}H_{12}DyNO_{10}$  (%): C, 32.54%; H, 2.34%; N, 2.71%. Found: C, 32.56%; H, 2.34%; N, 2.70%. IR (KBr pellet,  $cm^{-1}$ ): 3487 (w), 1542 (vs), 1454 (m), 1383 (vs), 1300 (s), 1261 (s), 1240 (s), 1211 (s), 1156 (m), 1138 (m), 1115 (w), 1080 (w), 1024 (s), 972 (m), 933 (vw), 884 (w), 854 (m), 836 (s), 813 (s), 788 (s), 687 (m), 673 (m), 631 (m), 601 (w), 578 (w), 559 (w), 477 (w), 423 (s), 416 (m), 405 (m).

### Syntheses of $\{[Eu_{0.059}Tb_{0.051}Gd_{0.89}(DPON)(H_2O)_2] \cdot (H_2O)\}_n$

The doping coordination polymer was also similar to that of coordination polymer **1-Nd** except using 0.059: 0.051 :0.89 ratios of  $Eu(NO_3)_3 \cdot 6H_2O$ ,  $Tb(NO_3)_3 \cdot 6H_2O$  and  $Gd(NO_3)_3 \cdot 6H_2O$  instead of  $Nd(NO_3)_3 \cdot 6H_2O$ . The reaction time is reduced to 1h to obtain microcrystals. Colorless microcrystals of  $Eu_{0.059}Tb_{0.051}Gd_{0.89}$ -**DPON** were collected and washed with distilled water and then dried under atmosphere (yield 95% based on Ln(III)). Anal. Calcd (%): C, 32.89%; H, 2.37%; N, 2.74%. Found: C, 32.91%; H, 2.37%; N, 2.73%. IR (KBr pellet,  $cm^{-1}$ ): 3487 (w), 1543 (vs), 1454 (m), 1383 (vs), 1300 (s), 1261 (s), 1240 (s), 1211 (s), 1156 (m), 1138 (m), 1115 (w), 1080 (w), 1024 (s), 971 (m), 933 (vw), 884 (w), 854 (m), 836 (s), 813 (s), 788 (s), 687 (m), 673 (m), 631 (m), 601 (w), 578 (w), 560 (w), 478 (w), 423 (s), 415 (m), 405 (m).

### White Light Adjustment

We have synthesized a series of heterometallic Ln-MOFs  $Eu_xTb_yGd_{1-x-y}$ -**DPON** with different ratios of Eu/Tb/Gd to introduce multiple fluorescent centers. With the decrease of Eu/Tb ratio, the characteristic emission peaks of  $Tb^{3+}$  gradually increased,

while those of  $\text{Eu}^{3+}$  decrease under 321 nm excitation (Fig. 2a). CIE coordinates gradually change from red to yellow, and finally close to the green area (Fig. 2b). Then  $\text{Eu}_{0.059}\text{Tb}_{0.051}\text{Gd}_{0.89}\text{-DPON}$  is selected to balance the intensity of red and green light and its photophysical properties under different excitation wavelength are investigated (Fig. 2c). Under low-wavelength excitation, it exhibited apparent characteristic emission of  $\text{Eu}^{3+}$  and  $\text{Tb}^{3+}$ . Emission intensity of  $\text{Ln}^{3+}$  gradually increased with excitation wavelength and reached a maximum at 321 nm excitation. As the excitation wavelength increase to 325 nm, the broad emission of the ligand gradually appeared at blue light region. Upon increase to 340 nm, the emission intensities of ligand,  $\text{Eu}^{3+}$  and  $\text{Tb}^{3+}$  are comparable, which result in white light emission. Therefore, a single-phase white light MOF was obtained with CIE coordinates of (0.333, 0.335) under 340 nm excitation. The fluorescence lifetime values are  $\tau_{\text{Tb}} = 0.801$  ms and  $\tau_{\text{Eu}} = 0.362$  ms, and the overall quantum yield is about 15.2% (Table S9 and S11). In addition,  $\text{Eu}_{0.059}\text{Tb}_{0.051}\text{Gd}_{0.89}\text{-DPON}$  exhibit almost the same  $\text{Ln}^{3+}$  fluorescence lifetime as 3-Eu and 5-Tb (Table S11), thus the energy transfer from  $\text{Tb}^{3+}$  to  $\text{Eu}^{3+}$  in  $\text{Eu}_{0.059}\text{Tb}_{0.051}\text{Gd}_{0.89}\text{-DPON}$  hardly exists.

### **Detection for Formol in Vapor**

In order to facilitate the operation when used as fluorescent probe,  $\text{Eu}_{0.059}\text{Tb}_{0.051}\text{Gd}_{0.89}\text{-DPON}$  was doped into polyvinyl alcohol (PVA) to form a thin film and the obtained fluorescence film show a similar emission performance compared to  $\text{Eu}_{0.059}\text{Tb}_{0.051}\text{Gd}_{0.89}\text{-DPON}$  powder, except a reduction in emission intensity (Fig. S17). The compartment with a hole in the container is to ensure that the



concentration of formol increases slowly and steadily. Taking the precise determination of formol concentration into account, an air formol detector is set next to the  $\text{Eu}_{0.059}\text{Tb}_{0.051}\text{Gd}_{0.89}$ -DPON PVA film in the device (Fig. 6c). 10  $\mu\text{L}$  formol with different concentrations were respectively added into the container (16 L) to provide the formol atmosphere and closed the lid, then waited for formol to evaporate and diffuse in closed container. When the formol detector showed a stable concentration, the film was taken out and recorded for emission spectra under 340 nm excitation. The emission spectra response to the formol in vapor are recorded in Fig. S18. Comparing the fluorescence intensity at 544 nm, a sudden drop occurs at the formol concentration of 1.592  $\text{mg}/\text{m}^3$  in air, that means an obvious fluorescence response towards formol in air and makes  $\text{Eu}_{0.059}\text{Tb}_{0.051}\text{Gd}_{0.89}$ -DPON PVA film a promising fluorescence platform in practical application.

### **Polluting Ions Recognition Process**

The as-prepared  $\text{Eu}_{0.059}\text{Tb}_{0.051}\text{Gd}_{0.89}$ -DPON (1 mg) was dispersed into distilled water (10 mL) to form an aqueous suspension and then various solutions of ions (1 mM) were added into this suspension. During the sensing measurements, the authors adopted the same excitation wavelength at 340 nm. Then, the suspension which contained  $\text{Eu}_{0.059}\text{Tb}_{0.051}\text{Gd}_{0.89}$ -DPON and additional ions were vibrated and mixed to form homogeneous solutions for luminescent measurements.

### **Cations detection in aqueous solution**

In this work, 19 kinds of cations ( $\text{Na}^+$ ,  $\text{K}^+$ ,  $\text{NH}_4^+$ ,  $\text{Ag}^+$ ,  $\text{Cu}^+$ ,  $\text{Cu}^{2+}$ ,  $\text{Ca}^{2+}$ ,  $\text{Mg}^{2+}$ ,  $\text{Zn}^{2+}$ ,  $\text{Ba}^{2+}$ ,  $\text{Co}^{2+}$ ,  $\text{Cd}^{2+}$ ,  $\text{Hg}^{2+}$ ,  $\text{Mn}^{2+}$ ,  $\text{Ni}^{2+}$ ,  $\text{Fe}^{2+}$ ,  $\text{Sn}^{2+}$ ,  $\text{Fe}^{3+}$ ,  $\text{Sn}^{4+}$ ) were chosen for

detection and their emission spectra excited under 340 nm are recorded in Fig. S19a. We can see that various cations (1 mM) have different degrees of quenching effect on the luminescence of  $\text{Eu}_{0.059}\text{Tb}_{0.051}\text{Gd}_{0.89}\text{-DPON}$ . The intensity of all three emission centers of ligand,  $\text{Tb}^{3+}$  and  $\text{Eu}^{3+}$  gradually decrease from  $\text{Hg}^{2+}$  to  $\text{Fe}^{3+}$  in Fig. S20a. Compared with the free  $\text{Eu}_{0.059}\text{Tb}_{0.051}\text{Gd}_{0.89}\text{-DPON}$  in water, four cations ( $\text{Hg}^{2+}$ ,  $\text{Cd}^{2+}$ ,  $\text{Na}^+$  and  $\text{Ca}^{2+}$ ) exhibited weak effect on the luminescence of  $\text{Eu}_{0.059}\text{Tb}_{0.051}\text{Gd}_{0.89}\text{-DPON}$ , while  $\text{NH}_4^+$ ,  $\text{K}^+$ ,  $\text{Ag}^+$ ,  $\text{Co}^{2+}$ ,  $\text{Mg}^{2+}$ ,  $\text{Ba}^{2+}$ ,  $\text{Zn}^{2+}$  and  $\text{Mn}^{2+}$  slightly quenched the fluorescence, and the quenching capability of  $\text{Ni}^{2+}$ ,  $\text{Cu}^{2+}$ ,  $\text{Sn}^{2+}$ ,  $\text{Fe}^{2+}$ ,  $\text{Cu}^+$  and  $\text{Sn}^{4+}$  is significantly enhanced. When treated with  $\text{Fe}^{3+}$ , the emission bands of both  $\text{Ln}^{3+}$  and ligand disappeared completely.

### **FT-IR spectra analysis**

The FT-IR spectra are shown in Figures S4. The FT-IR spectra of all Ln-MOFs are similar, the hydroxyl group stretching vibration for the coordinated water molecules and free water molecules appear at  $3500\text{ cm}^{-1}$ . The strong vibrations appearing at around  $1540\text{ cm}^{-1}$  correspond to the asymmetric stretching vibration of the carboxylate group, while the strong vibrations appearing at around  $1380\text{ cm}^{-1}$  correspond to the symmetric stretching vibration of the carboxylate group. The  $(\nu_{\text{as}}(\text{COO}^-) - \nu_{\text{s}}(\text{COO}^-))$  values of all Ln-MOFs are less than  $200\text{ cm}^{-1}$ , indicating the chelating coordinate mode of carboxylate group in these Ln-MOFs. These are in good agreement with the results of single-crystal X-ray diffraction analysis.

### **TG analysis**

As the TG curves shown in Figure S5, the weight loss before  $170\text{ }^\circ\text{C}$  is about 3.6%, which is attributed to the loss of free  $\text{H}_2\text{O}$  molecule in the structure. The weight

lose (7.1%) from 170 °C to 190 °C is attributed to the two H<sub>2</sub>O molecules that coordinated with Ln<sup>3+</sup>. Finally, the framework of Ln-MOFs begin to collapse at about 450 °C, proving the high stability of the Ln-MOFs. These weight lose are in good agreement with the results of single-crystal X-ray diffraction analysis.

### **PXRD analysis**

As shown in Figure S6(a), the PXRD patterns of **1-Nd** ~ **6-Dy** and **Eu<sub>0.059</sub>Tb<sub>0.051</sub>Gd<sub>0.89</sub>-DPON** are consistent with each other and match well with the simulation one. That means all Ln-MOFs are isomorphous. When the **Eu<sub>0.059</sub>Tb<sub>0.051</sub>Gd<sub>0.89</sub>-DPON** is treated with Fe<sup>3+</sup>, VO<sub>4</sub><sup>3-</sup>, and formol, the framework integrity is confirmed by PXRD patterns in Figure S6(b). As for S<sup>2-</sup>, the diffraction peak of **Eu<sub>0.059</sub>Tb<sub>0.051</sub>Gd<sub>0.89</sub>-DPON** disappears and the crystallinity decreases which mean the framework collapse of **Eu<sub>0.059</sub>Tb<sub>0.051</sub>Gd<sub>0.89</sub>-DPON** induced by S<sup>2-</sup>.

## Section 2. Structural Information.

**Table S1** Crystallographic data and structural refinements for coordination polymers **1-Nd** ~ **6-Dy**.

|                                                   | <b>1-Nd</b>                                                     | <b>2-Sm</b>                                                     | <b>3-Eu</b>                                                     | <b>4-Gd</b>                                                     | <b>5-Tb</b>                                                     | <b>6-Dy</b>                                                     |
|---------------------------------------------------|-----------------------------------------------------------------|-----------------------------------------------------------------|-----------------------------------------------------------------|-----------------------------------------------------------------|-----------------------------------------------------------------|-----------------------------------------------------------------|
| Empirical formula                                 | C <sub>14</sub> H <sub>12</sub> NdNO                            | C <sub>14</sub> H <sub>12</sub> SmNO                            | C <sub>14</sub> H <sub>12</sub> EuNO                            | C <sub>14</sub> H <sub>12</sub> GdNO                            | C <sub>14</sub> H <sub>12</sub> TbNO                            | C <sub>14</sub> H <sub>12</sub> DyNO                            |
| Formula weight                                    | 498.49                                                          | 504.6                                                           | 506.21                                                          | 511.5                                                           | 513.17                                                          | 516.75                                                          |
| Crystal system                                    | Triclinic                                                       | Triclinic                                                       | Triclinic                                                       | Triclinic                                                       | Triclinic                                                       | Triclinic                                                       |
| Space group                                       | <i>P</i> Error!                                                 |
| <i>a</i> /Å                                       | 6.043(3)                                                        | 6.006(3)                                                        | 6.000(1)                                                        | 5.979 (1)                                                       | 5.962(2)                                                        | 5.955 (1)                                                       |
| <i>b</i> /Å                                       | 11.817(6)                                                       | 11.758(7)                                                       | 11.778(2)                                                       | 11.758(2)                                                       | 11.757(4)                                                       | 11.780(2)                                                       |
| <i>c</i> /Å                                       | 12.667(7)                                                       | 12.603(7)                                                       | 12.584(2)                                                       | 12.574(2)                                                       | 12.566(4)                                                       | 12.542(2)                                                       |
| $\alpha$ (°)                                      | 110.247(5)                                                      | 110.141(6)                                                      | 110.091(1)                                                      | 110.206(2)                                                      | 110.209(4)                                                      | 110.040(2)                                                      |
| $\beta$ (°)                                       | 94.315(6)                                                       | 94.201(7)                                                       | 94.335(1)                                                       | 94.086(2)                                                       | 94.073(4)                                                       | 94.431(2)                                                       |
| $\gamma$ (°)                                      | 103.043(5)                                                      | 102.980(6)                                                      | 103.181(1)                                                      | 103.083(2)                                                      | 103.086(3)                                                      | 103.214(2)                                                      |
| Volume/Å <sup>3</sup>                             | 815.0(7)                                                        | 803.1(8)                                                        | 801.5(2)                                                        | 797.2(2)                                                        | 794.3(4)                                                        | 793.0(2)                                                        |
| <i>Z</i>                                          | 2                                                               | 2                                                               | 2                                                               | 2                                                               | 2                                                               | 2                                                               |
| <i>D</i> <sub>calcd</sub> /Mg·m <sup>-3</sup>     | 2.031                                                           | 2.087                                                           | 2.098                                                           | 2.131                                                           | 2.146                                                           | 2.164                                                           |
| $\mu$ /mm <sup>-1</sup>                           | 3.242                                                           | 3.714                                                           | 3.971                                                           | 4.218                                                           | 4.510                                                           | 4.770                                                           |
| <i>F</i> (000)                                    | 486                                                             | 490                                                             | 492                                                             | 494                                                             | 496                                                             | 498                                                             |
| $\theta$ range (°)                                | 1.738 – 24.999                                                  | 1.745 – 25.000                                                  | 1.748 – 24.999                                                  | 3.038 – 24.999                                                  | 1.750 – 24.995                                                  | 1.754 – 24.993                                                  |
| Limiting indices                                  | -7 ≤ <i>h</i> ≤ 7<br>-14 ≤ <i>k</i> ≤ 14<br>-15 ≤ <i>l</i> ≤ 15 | -7 ≤ <i>h</i> ≤ 6<br>-13 ≤ <i>k</i> ≤ 13<br>-14 ≤ <i>l</i> ≤ 14 | -7 ≤ <i>h</i> ≤ 7<br>-13 ≤ <i>k</i> ≤ 13<br>-14 ≤ <i>l</i> ≤ 14 | -6 ≤ <i>h</i> ≤ 7<br>-13 ≤ <i>k</i> ≤ 13<br>-14 ≤ <i>l</i> ≤ 14 | -7 ≤ <i>h</i> ≤ 7<br>-13 ≤ <i>k</i> ≤ 13<br>-14 ≤ <i>l</i> ≤ 12 | -7 ≤ <i>h</i> ≤ 7<br>-13 ≤ <i>k</i> ≤ 13<br>-11 ≤ <i>l</i> ≤ 14 |
| GOF on <i>F</i> <sup>2</sup>                      | 1.167                                                           | 1.295                                                           | 0.89                                                            | 0.884                                                           | 1.269                                                           | 0.831                                                           |
| Final <i>R</i> <i>R</i> <sub>1</sub> <sup>a</sup> | 0.0342                                                          | 0.0297                                                          | 0.0282                                                          | 0.0302                                                          | 0.0253                                                          | 0.0277                                                          |
| indices                                           |                                                                 |                                                                 |                                                                 |                                                                 |                                                                 |                                                                 |
| [ <i>I</i> > 2σ( <i>I</i> )]                      | <sup>w</sup> <i>R</i> <sub>2</sub> <sup>b</sup> 0.0961          | 0.0820                                                          | 0.0820                                                          | 0.0760                                                          | 0.0676                                                          | 0.0800                                                          |
| <i>R</i> <i>R</i> <sub>1</sub>                    | 0.0376                                                          | 0.0358                                                          | 0.0350                                                          | 0.0371                                                          | 0.0310                                                          | 0.0363                                                          |
| indices (all data)                                | <sup>w</sup> <i>R</i> <sub>2</sub> <sup>b</sup> 0.1059          | 0.1088                                                          | 0.1042                                                          | 0.0787                                                          | 0.0888                                                          | 0.0994                                                          |
| CCDC                                              | 1873002                                                         | 1873003                                                         | 1873004                                                         | 1873005                                                         | 1873006                                                         | 1873007                                                         |

<sup>a</sup>  $R_1 = \sum ||F_o| - |F_c|| / \sum |F_o|$ . <sup>b</sup>  $wR_2 = \{ \sum [w(F_o^2 - F_c^2)^2] / \sum [w(F_o^2)^2] \}^{1/2}$

**Table S2** Selected bond lengths (Å) and bond angles (°) for **1-Nd**.

| Bond           | Bond Lengths (Å) | Bond          | Bond Lengths (Å) | Bond          | Bond Lengths (Å) |
|----------------|------------------|---------------|------------------|---------------|------------------|
| Nd-O(1W)       | 2.412(4)         | Nd-O(6)       | 2.475(4)         | Nd-O(7)       | 2.528(5)         |
| Nd-O(4)        | 2.439(4)         | Nd-O(5)       | 2.500(4)         | Nd-O(2)       | 2.551(5)         |
| Nd-O(2W)       | 2.469(5)         | Nd-O(3)       | 2.501(5)         | Nd-O(4)       | 2.685(4)         |
| Bond           | Bond Angles (°)  | Bond          | Bond Angles (°)  | Bond          | Bond Angles (°)  |
| O(1W)-Nd-O(4)  | 79.34(15)        | O(2W)-Nd-O(3) | 91.95(19)        | O(6)-Nd-O(2)  | 127.36(16)       |
| O(1W)-Nd-O(2W) | 75.41(18)        | O(6)-Nd-O(3)  | 79.71(16)        | O(5)-Nd-O(2)  | 72.47(16)        |
| O(4)-Nd-O(2W)  | 85.31(18)        | O(5)-Nd-O(3)  | 79.76(16)        | O(3)-Nd-O(2)  | 51.73(14)        |
| O(1W)-Nd-O(6)  | 148.55(16)       | O(1W)-Nd-O(7) | 145.80(17)       | O(7)-Nd-O(2)  | 117.39(17)       |
| O(4)-Nd-O(6)   | 80.73(15)        | O(4)-Nd-O(7)  | 80.70(17)        | O(1W)-Nd-O(4) | 74.09(15)        |
| O(2W)-Nd-O(6)  | 126.75(16)       | O(2W)-Nd-O(7) | 75.53(17)        | O(4)-Nd-O(4)  | 65.21(15)        |
| O(1W)-Nd-O(5)  | 85.64(16)        | O(6)-Nd-O(7)  | 51.63(14)        | O(2W)-Nd-O(4) | 140.71(16)       |
| O(4)-Nd-O(5)   | 114.86(14)       | O(5)-Nd-O(7)  | 128.12(16)       | O(6)-Nd-O(4)  | 75.54(13)        |
| O(2W)-Nd-O(5)  | 149.43(18)       | O(3)-Nd-O(7)  | 72.87(18)        | O(5)-Nd-O(4)  | 49.72(13)        |
| O(6)-Nd-O(5)   | 80.98(15)        | O(1W)-Nd-O(2) | 73.98(15)        | O(3)-Nd-O(4)  | 126.10(15)       |
| O(1W)-Nd-O(3)  | 125.69(16)       | O(4)-Nd-O(2)  | 151.77(15)       | O(7)-Nd-O(4)  | 121.05(15)       |
| O(4)-Nd-O(3)   | 153.25(15)       | O(2W)-Nd-O(2) | 79.28(19)        | O(2)-Nd-O(4)  | 114.70(14)       |

**Table S3** Selected bond lengths (Å) and bond angles (°) for **2-Sm**.

| Bond              | Bond Lengths (Å) | Bond             | Bond Lengths (Å) | Bond             | Bond Lengths (Å) |
|-------------------|------------------|------------------|------------------|------------------|------------------|
| Sm(1)-O(2W)       | 2.382(5)         | Sm(1)-O(5)       | 2.440(5)         | Sm(1)-O(4)       | 2.509(6)         |
| Sm(1)-O(6)        | 2.394(4)         | Sm(1)-O(7)       | 2.467(5)         | Sm(1)-O(2)       | 2.529(5)         |
| Sm(1)-O(1W)       | 2.431(5)         | Sm(1)-O(3)       | 2.476(5)         | Sm(1)-O(6)       | 2.687(5)         |
| Bond              | Bond Angles (°)  | Bond             | Bond Angles (°)  | Bond             | Bond Angles (°)  |
| O(2W)-Sm(1)-O(6)  | 79.05(17)        | O(1W)-Sm(1)-O(3) | 91.9(2)          | O(5)-Sm(1)-O(2)  | 127.70(16)       |
| O(2W)-Sm(1)-O(1W) | 75.8(2)          | O(5)-Sm(1)-O(3)  | 79.49(17)        | O(7)-Sm(1)-O(2)  | 72.43(17)        |
| O(6)-Sm(1)-O(1W)  | 85.29(19)        | O(7)-Sm(1)-O(3)  | 79.88(17)        | O(3)-Sm(1)-O(2)  | 52.26(16)        |
| O(2W)-Sm(1)-O(5)  | 148.00(17)       | O(2W)-Sm(1)-O(4) | 145.91(18)       | O(4)-Sm(1)-O(2)  | 117.29(18)       |
| O(6)-Sm(1)-O(5)   | 80.99(17)        | O(6)-Sm(1)-O(4)  | 80.88(18)        | O(2W)-Sm(1)-O(6) | 73.61(16)        |
| O(1W)-Sm(1)-O(5)  | 127.05(19)       | O(1W)-Sm(1)-O(4) | 75.32(19)        | O(6)-Sm(1)-O(6)  | 64.98(16)        |
| O(2W)-Sm(1)-O(7)  | 84.84(18)        | O(5)-Sm(1)-O(4)  | 52.13(16)        | O(1W)-Sm(1)-O(6) | 140.56(18)       |
| O(6)-Sm(1)-O(7)   | 115.05(15)       | O(7)-Sm(1)-O(4)  | 128.82(18)       | O(5)-Sm(1)-O(6)  | 75.35(15)        |
| O(1W)-Sm(1)-O(7)  | 148.8(2)         | O(3)-Sm(1)-O(4)  | 72.6(2)          | O(7)-Sm(1)-O(6)  | 50.11(14)        |
| O(5)-Sm(1)-O(7)   | 81.28(17)        | O(2W)-Sm(1)-O(2) | 73.86(16)        | O(3)-Sm(1)-O(6)  | 126.31(16)       |
| O(2W)-Sm(1)-O(3)  | 126.12(17)       | O(6)-Sm(1)-O(2)  | 151.17(17)       | O(4)-Sm(1)-O(6)  | 121.18(17)       |
| O(6)-Sm(1)-O(3)   | 153.17(18)       | O(1W)-Sm(1)-O(2) | 78.8(2)          | O(2)-Sm(1)-O(6)  | 115.08(16)       |

**Table S4** Selected bond lengths (Å) and bond angles (°) for **3-Eu**.

| Bond             | Bond Lengths (Å) | Bond             | Bond Lengths (Å) | Bond            | Bond Lengths (Å) |
|------------------|------------------|------------------|------------------|-----------------|------------------|
| Eu(1)-O(1W)      | 2.373(4)         | Eu(1)-O(6)       | 2.435(4)         | Eu(1)-O(7)      | 2.496(5)         |
| Eu(1)-O(5)       | 2.384(4)         | Eu(1)-O(4)       | 2.451(4)         | Eu(1)-O(2)      | 2.515(5)         |
| Eu(1)-O(2W)      | 2.417(5)         | Eu(1)-O(3)       | 2.460(4)         | Eu(1)-O(5)      | 2.684(4)         |
| Bond             | Bond Angles (°)  | Bond             | Bond Angles (°)  | Bond            | Bond Angles (°)  |
| O(1W)-Eu(1)-O(5) | 79.14(15)        | O(2W)-Eu(1)-O(3) | 91.9(2)          | O(6)-Eu(1)-O(2) | 127.70(15)       |

|                   |            |                  |            |                  |            |
|-------------------|------------|------------------|------------|------------------|------------|
| O(1W)-Eu(1)-O(2W) | 76.29(18)  | O(6)-Eu(1)-O(3)  | 79.41(15)  | O(4)-Eu(1)-O(2)  | 72.63(16)  |
| O(5)-Eu(1)-O(2W)  | 85.12(18)  | O(4)-Eu(1)-O(3)  | 80.16(16)  | O(3)-Eu(1)-O(2)  | 52.55(14)  |
| O(1W)-Eu(1)-O(6)  | 147.69(16) | O(1W)-Eu(1)-O(7) | 145.96(17) | O(7)-Eu(1)-O(2)  | 117.67(17) |
| O(5)-Eu(1)-O(6)   | 80.90(15)  | O(5)-Eu(1)-O(7)  | 80.55(16)  | O(1W)-Eu(1)-O(5) | 73.45(15)  |
| O(2W)-Eu(1)-O(6)  | 126.87(17) | O(2W)-Eu(1)-O(7) | 75.01(17)  | O(5)-Eu(1)-O(5)  | 64.72(16)  |
| O(1W)-Eu(1)-O(4)  | 84.87(16)  | O(6)-Eu(1)-O(7)  | 52.25(15)  | O(2W)-Eu(1)-O(5) | 140.44(17) |
| O(5)-Eu(1)-O(4)   | 114.82(14) | O(4)-Eu(1)-O(7)  | 128.65(16) | O(6)-Eu(1)-O(5)  | 75.13(13)  |
| O(2W)-Eu(1)-O(4)  | 149.56(19) | O(3)-Eu(1)-O(7)  | 72.63(17)  | O(4)-Eu(1)-O(5)  | 50.16(13)  |
| O(6)-Eu(1)-O(4)   | 80.80(15)  | O(1W)-Eu(1)-O(2) | 73.82(15)  | O(3)-Eu(1)-O(5)  | 126.64(16) |
| O(1W)-Eu(1)-O(3)  | 126.37(15) | O(5)-Eu(1)-O(2)  | 151.24(15) | O(7)-Eu(1)-O(5)  | 120.82(15) |
| O(5)-Eu(1)-O(3)   | 152.85(16) | O(2W)-Eu(1)-O(2) | 79.2(2)    | O(2)-Eu(1)-O(5)  | 115.18(15) |

**Table S5** Selected bond lengths (Å) and bond angles (°) for **4-Gd**.

| Bond              | Bond Lengths (Å) | Bond             | Bond Lengths (Å) | Bond             | Bond Lengths (Å) |
|-------------------|------------------|------------------|------------------|------------------|------------------|
| Gd(1)-O(1W)       | 2.358(4)         | Gd(1)-O(5)       | 2.421(4)         | Gd(1)-O(4)       | 2.486(4)         |
| Gd(1)-O(6)        | 2.366(4)         | Gd(1)-O(7)       | 2.434(4)         | Gd(1)-O(2)       | 2.501(4)         |
| Gd(1)-O(2W)       | 2.403(4)         | Gd(1)-O(3)       | 2.447(4)         | Gd(1)-O(6)       | 2.694(4)         |
| Bond              | Bond Angles (°)  | Bond             | Bond Angles (°)  | Bond             | Bond Angles (°)  |
| O(1W)-Gd(1)-O(6)  | 78.64(14)        | O(2W)-Gd(1)-O(3) | 91.65(16)        | O(5)-Gd(1)-O(2)  | 127.98(13)       |
| O(1W)-Gd(1)-O(2W) | 76.24(15)        | O(5)-Gd(1)-O(3)  | 79.31(14)        | O(7)-Gd(1)-O(2)  | 72.70(14)        |
| O(6)-Gd(1)-O(2W)  | 85.50(16)        | O(7)-Gd(1)-O(3)  | 80.20(13)        | O(3)-Gd(1)-O(2)  | 52.76(13)        |
| O(1W)-Gd(1)-O(5)  | 147.50(14)       | O(1W)-Gd(1)-O(4) | 145.63(14)       | O(4)-Gd(1)-O(2)  | 117.53(15)       |
| O(6)-Gd(1)-O(5)   | 81.13(13)        | O(6)-Gd(1)-O(4)  | 80.70(14)        | O(1W)-Gd(1)-O(6) | 73.41(13)        |
| O(2W)-Gd(1)-O(5)  | 127.18(14)       | O(2W)-Gd(1)-O(4) | 75.01(15)        | O(6)-Gd(1)-O(6)  | 64.72(13)        |
| O(1W)-Gd(1)-O(7)  | 84.58(14)        | O(5)-Gd(1)-O(4)  | 52.50(13)        | O(2W)-Gd(1)-O(6) | 140.78(14)       |
| O(6)-Gd(1)-O(7)   | 114.90(12)       | O(7)-Gd(1)-O(4)  | 129.27(14)       | O(5)-Gd(1)-O(6)  | 75.02(12)        |
| O(2W)-Gd(1)-O(7)  | 148.74(17)       | O(3)-Gd(1)-O(4)  | 72.67(15)        | O(7)-Gd(1)-O(6)  | 50.20(11)        |
| O(5)-Gd(1)-O(7)   | 81.19(13)        | O(1W)-Gd(1)-O(2) | 73.94(13)        | O(3)-Gd(1)-O(6)  | 126.51(13)       |
| O(1W)-Gd(1)-O(3)  | 126.70(14)       | O(6)-Gd(1)-O(2)  | 150.75(14)       | O(4)-Gd(1)-O(6)  | 120.91(14)       |
| O(6)-Gd(1)-O(3)   | 153.01(14)       | O(2W)-Gd(1)-O(2) | 78.34(17)        | O(2)-Gd(1)-O(6)  | 115.46(13)       |

**Table S6** Selected bond lengths (Å) and bond angles (°) for **5-Tb**.

| Bond              | Bond Lengths (Å) | Bond             | Bond Lengths (Å) | Bond             | Bond Lengths (Å) |
|-------------------|------------------|------------------|------------------|------------------|------------------|
| Tb(1)-O(1W)       | 2.344(4)         | Tb(1)-O(5)       | 2.406(4)         | Tb(1)-O(4)       | 2.474(5)         |
| Tb(1)-O(6)        | 2.353(4)         | Tb(1)-O(7)       | 2.417(4)         | Tb(1)-O(2)       | 2.488(5)         |
| Tb(1)-O(2W)       | 2.388(5)         | Tb(1)-O(3)       | 2.432(4)         | Tb(1)-O(6)       | 2.711(4)         |
| Bond              | Bond Angles (°)  | Bond             | Bond Angles (°)  | Bond             | Bond Angles (°)  |
| O(1W)-Tb(1)-O(6)  | 78.68(15)        | O(2W)-Tb(1)-O(3) | 92.15(18)        | O(5)-Tb(1)-O(2)  | 128.21(14)       |
| O(1W)-Tb(1)-O(2W) | 76.56(17)        | O(5)-Tb(1)-O(3)  | 79.48(15)        | O(7)-Tb(1)-O(2)  | 72.99(16)        |
| O(6)-Tb(1)-O(2W)  | 85.04(17)        | O(7)-Tb(1)-O(3)  | 80.42(15)        | O(3)-Tb(1)-O(2)  | 52.92(14)        |
| O(1W)-Tb(1)-O(5)  | 147.02(15)       | O(1W)-Tb(1)-O(4) | 145.69(16)       | O(4)-Tb(1)-O(2)  | 117.43(16)       |
| O(6)-Tb(1)-O(5)   | 80.95(15)        | O(6)-Tb(1)-O(4)  | 80.86(16)        | O(1W)-Tb(1)-O(6) | 73.35(14)        |
| O(2W)-Tb(1)-O(5)  | 127.09(16)       | O(2W)-Tb(1)-O(4) | 74.47(17)        | O(6)-Tb(1)-O(6)  | 64.42(15)        |
| O(1W)-Tb(1)-O(7)  | 84.30(15)        | O(5)-Tb(1)-O(4)  | 53.05(14)        | O(2W)-Tb(1)-O(6) | 140.43(16)       |
| O(6)-Tb(1)-O(7)   | 114.46(14)       | O(7)-Tb(1)-O(4)  | 129.48(15)       | O(5)-Tb(1)-O(6)  | 74.53(13)        |
| O(2W)-Tb(1)-O(7)  | 149.50(19)       | O(3)-Tb(1)-O(4)  | 72.59(17)        | O(7)-Tb(1)-O(6)  | 50.06(13)        |
| O(5)-Tb(1)-O(7)   | 80.88(14)        | O(1W)-Tb(1)-O(2) | 73.82(14)        | O(3)-Tb(1)-O(6)  | 126.52(15)       |
| O(1W)-Tb(1)-O(3)  | 126.74(15)       | O(6)-Tb(1)-O(2)  | 150.67(15)       | O(4)-Tb(1)-O(6)  | 120.95(15)       |
| O(6)-Tb(1)-O(3)   | 153.05(16)       | O(2W)-Tb(1)-O(2) | 78.93(19)        | O(2)-Tb(1)-O(6)  | 115.65(14)       |

**Table S7** Selected bond lengths (Å) and bond angles (°) for **6-Dy**.

| Bond              | Bond Lengths (Å) | Bond             | Bond Lengths (Å) | Bond             | Bond Lengths (Å) |
|-------------------|------------------|------------------|------------------|------------------|------------------|
| Dy(1)-O(1W)       | 2.325(4)         | Dy(1)-O(6)       | 2.392(4)         | Dy(1)-O(7)       | 2.468(5)         |
| Dy(1)-O(4)        | 2.336(4)         | Dy(1)-O(5)       | 2.408(5)         | Dy(1)-O(3)       | 2.481(5)         |
| Dy(1)-O(2W)       | 2.379(5)         | Dy(1)-O(2)       | 2.422(5)         | Dy(1)-O(4)       | 2.723(5)         |
| Bond              | Bond Angles (°)  | Bond             | Bond Angles (°)  | Bond             | Bond Angles (°)  |
| O(1W)-Dy(1)-O(4)  | 78.50(16)        | O(2W)-Dy(1)-O(2) | 91.9(2)          | O(6)-Dy(1)-O(3)  | 128.40(16)       |
| O(1W)-Dy(1)-O(2W) | 76.27(19)        | O(6)-Dy(1)-O(2)  | 79.45(16)        | O(5)-Dy(1)-O(3)  | 72.98(17)        |
| O(4)-Dy(1)-O(2W)  | 85.7(2)          | O(5)-Dy(1)-O(2)  | 80.56(17)        | O(2)-Dy(1)-O(3)  | 53.36(15)        |
| O(1W)-Dy(1)-O(6)  | 147.05(17)       | O(1W)-Dy(1)-O(7) | 145.26(18)       | O(7)-Dy(1)-O(3)  | 117.94(18)       |
| O(4)-Dy(1)-O(6)   | 80.81(16)        | O(4)-Dy(1)-O(7)  | 80.89(17)        | O(1W)-Dy(1)-O(4) | 73.77(16)        |
| O(2W)-Dy(1)-O(6)  | 127.35(18)       | O(2W)-Dy(1)-O(7) | 74.55(19)        | O(4)-Dy(1)-O(4)  | 64.06(17)        |
| O(1W)-Dy(1)-O(5)  | 84.78(17)        | O(6)-Dy(1)-O(7)  | 53.18(16)        | O(2W)-Dy(1)-O(4) | 140.77(18)       |
| O(4)-Dy(1)-O(5)   | 114.00(16)       | O(5)-Dy(1)-O(7)  | 129.39(17)       | O(6)-Dy(1)-O(4)  | 74.19(14)        |
| O(2W)-Dy(1)-O(5)  | 149.5(2)         | O(2)-Dy(1)-O(7)  | 72.60(18)        | O(5)-Dy(1)-O(4)  | 49.97(14)        |
| O(6)-Dy(1)-O(5)   | 80.56(16)        | O(1W)-Dy(1)-O(3) | 73.61(16)        | O(2)-Dy(1)-O(4)  | 126.50(16)       |
| O(1W)-Dy(1)-O(2)  | 126.96(16)       | O(4)-Dy(1)-O(3)  | 150.54(17)       | O(7)-Dy(1)-O(4)  | 120.67(17)       |
| O(4)-Dy(1)-O(2)   | 153.04(17)       | O(2W)-Dy(1)-O(3) | 78.8(2)          | O(3)-Dy(1)-O(4)  | 115.46(16)       |

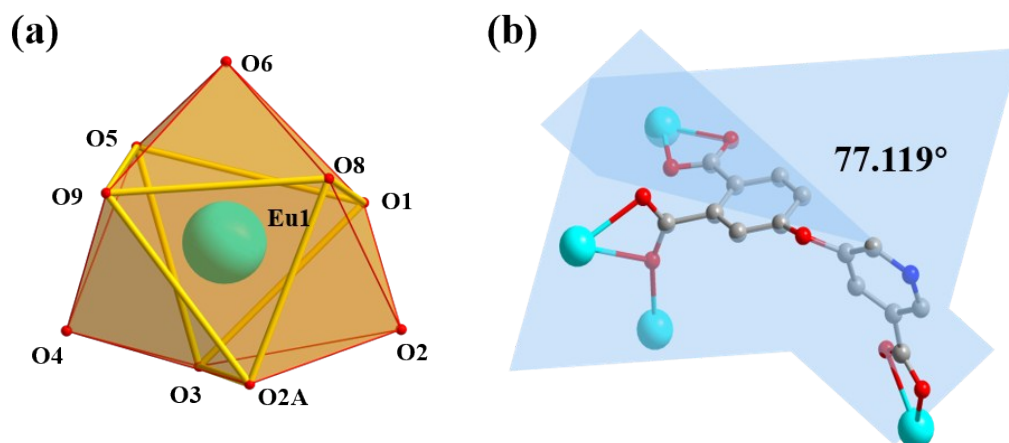

**Figure S1.** (a) Twisted tri-capped triangular prismatic geometry of  $\text{Eu}^{3+}$  in 3-Eu. (b) The dihedral angle between benzene ring and pyridine ring in ligand.

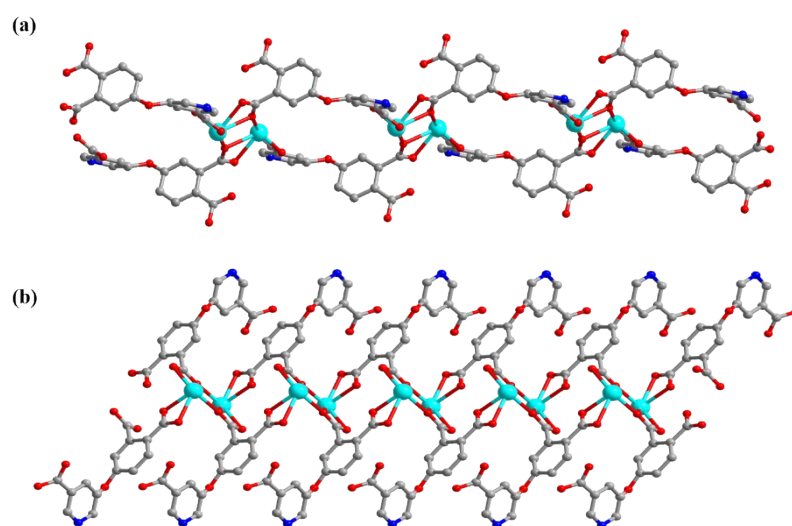

**Figure S2.** The one-dimensional chains structure along the a axis (a) and b axis (b).

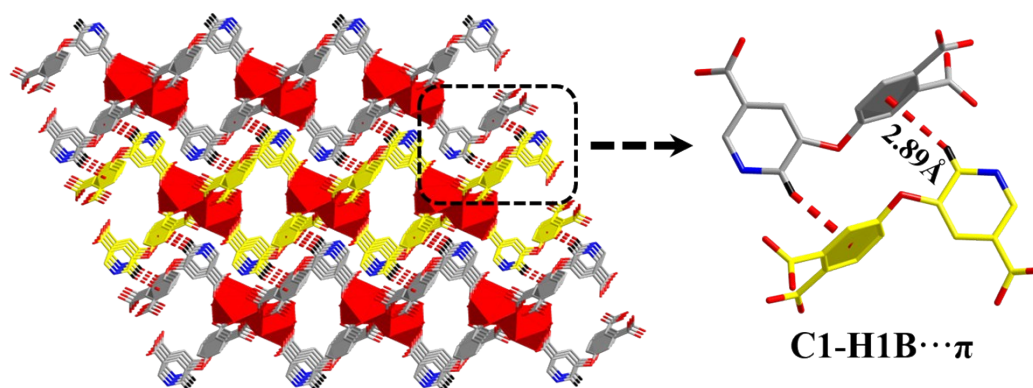

**Figure S3.** The 3D structure constructed by hydrogen bonding ( $\text{C1-H1B}\cdots\pi$ ).



### Section 3. Crystal structure characterizations of Ln-MOFs.

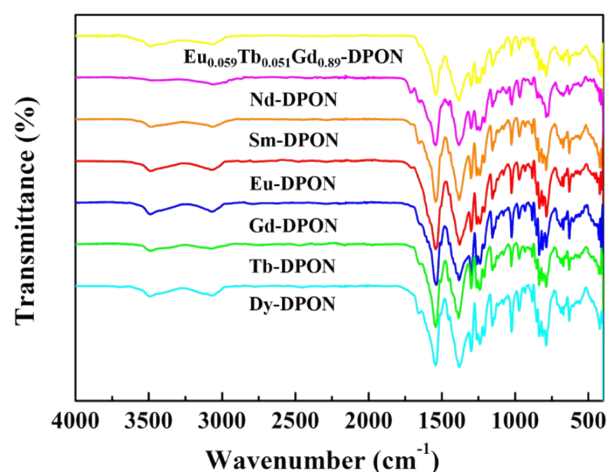

Figure S4. FT-IR spectra of 1-Nd ~ 6-Dy and  $\text{Eu}_{0.059}\text{Tb}_{0.051}\text{Gd}_{0.89}$ -DPON.

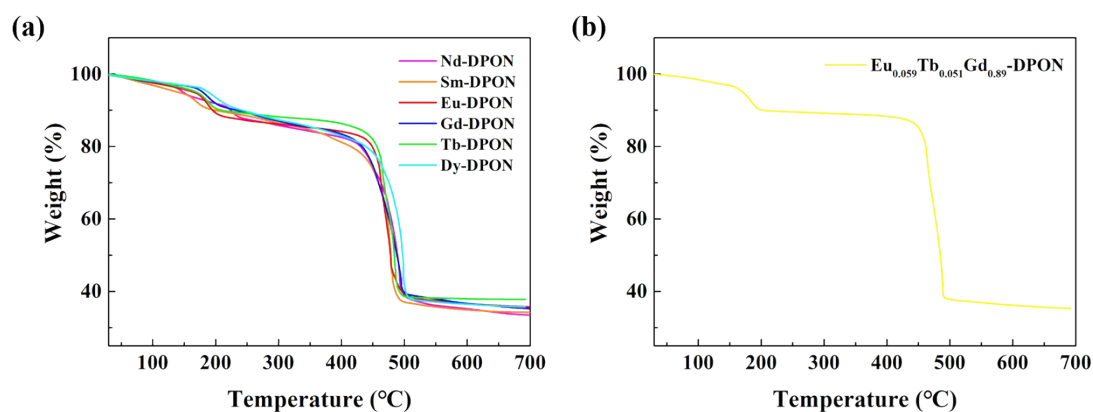

Figure S5. TG curves of (a) 1-Nd ~ 6-Dy and (b)  $\text{Eu}_{0.059}\text{Tb}_{0.051}\text{Gd}_{0.89}$ -DPON.

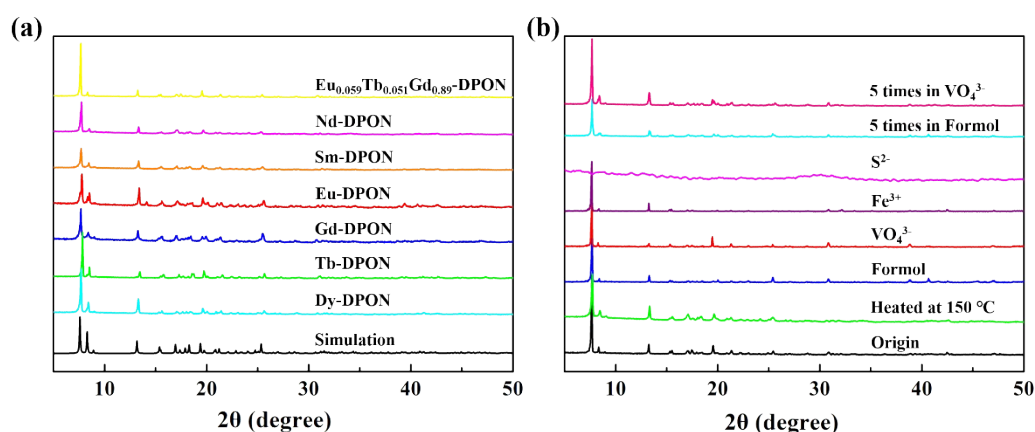

Figure S6. (a) PXRD patterns of 1-Nd ~ 6-Dy and  $\text{Eu}_{0.059}\text{Tb}_{0.051}\text{Gd}_{0.89}$ -DPON. (b) PXRD patterns of  $\text{Eu}_{0.059}\text{Tb}_{0.051}\text{Gd}_{0.89}$ -DPON heated at 150 °C or treated by various substances.

Table S8 The ICP-MS results of  $\text{Eu}_{0.059}\text{Tb}_{0.051}\text{Gd}_{0.89}$ -DPON

| sample                                                     | Molar ratio of the reactant Eu/Tb/Gd salt | Eu/Tb/Gd mass ratio (ppm/ppm) | Eu/Tb/Gd molar ratio |
|------------------------------------------------------------|-------------------------------------------|-------------------------------|----------------------|
| $\text{Eu}_{0.059}\text{Tb}_{0.051}\text{Gd}_{0.89}$ -DPON | 5.9:5.1:89                                | 1.128:1.011:17.488            | 5.94:5.09:88.97      |

## Section 4. The Fluorescence performance of Ln-MOFs.

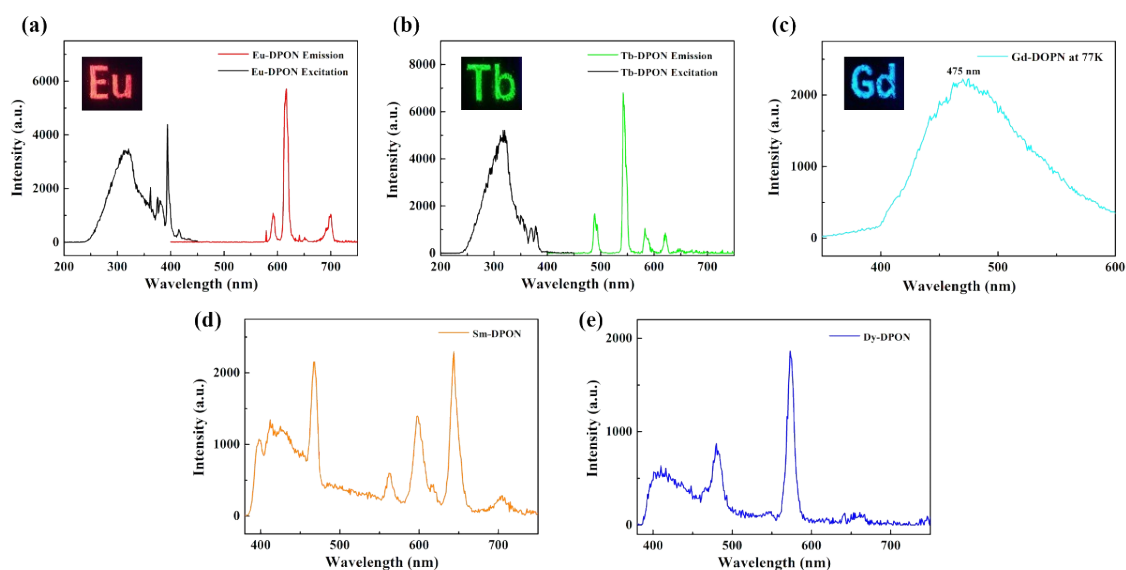

**Figure S7.** The excitation and emission spectra of (a) **3-Eu**, (b) **5-Tb**, (c) **4-Gd**, (d) **2-Sm** and (e) **6-Dy** excited at 321 nm.

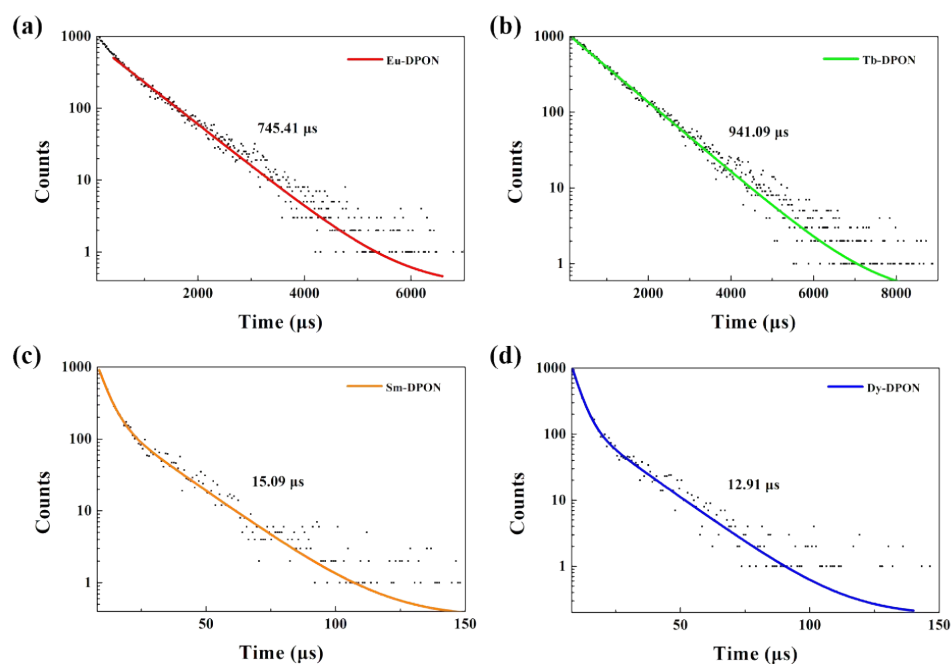

**Figure S8.** The fluorescence lifetime of (a) **3-Eu**, (b) **5-Tb**, (c) **2-Sm** and (d) **6-Dy** excited at 321 nm.

**Table S9** Quantum yields ( $\Phi$ ) of pre and post heating Ln-MOFs.

| $\Phi\%$                         | <b>3-Eu</b> | <b>5-Tb</b> | <b>Eu<sub>0.059</sub>Tb<sub>0.051</sub>Gd<sub>0.89</sub>-DPON</b> |
|----------------------------------|-------------|-------------|-------------------------------------------------------------------|
| <b>Original</b>                  | 10.5        | 41.8        | 15.2                                                              |
| <b>Heated at 150 °C for 12 h</b> | 11.2        | 40.5        | 14.9                                                              |

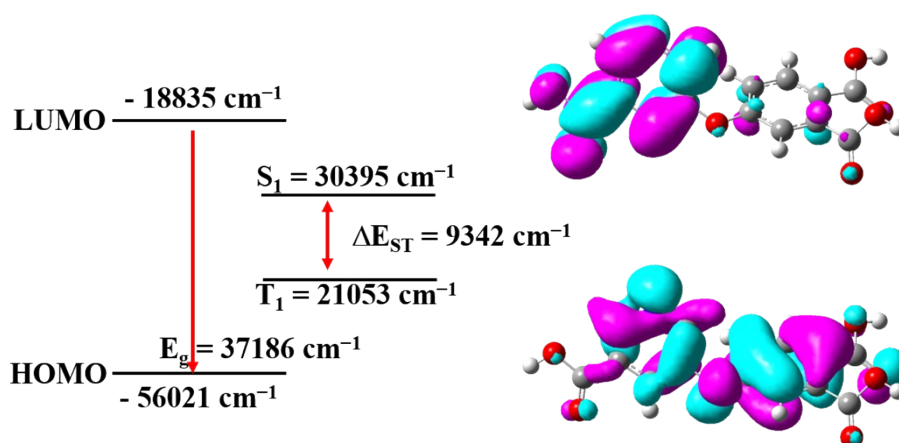

**Figure S9.** The calculated result of H<sub>3</sub>DPON ligand through DFT calculations at the B3LYP/6-31 G\* level.

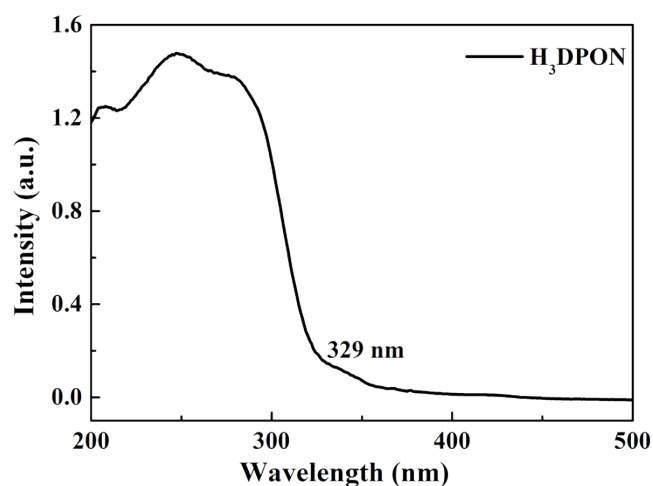

**Figure S10.** The UV-vis spectrum of H<sub>3</sub>DPON ligand.

## Section 5. Fluorescent Response Mechanism.

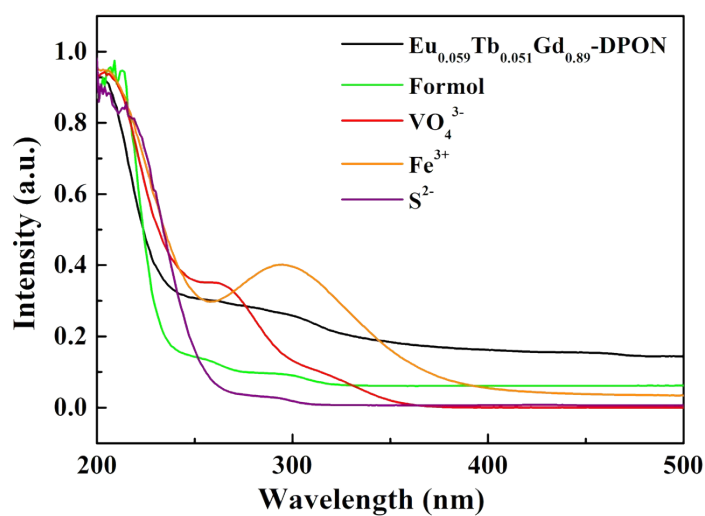

**Figure S11.** The UV-vis spectra of Eu<sub>0.059</sub>Tb<sub>0.051</sub>Gd<sub>0.89</sub>-DPON, formol, VO<sub>4</sub><sup>3-</sup>, Fe<sup>3+</sup> and S<sup>2-</sup> aqueous solution.

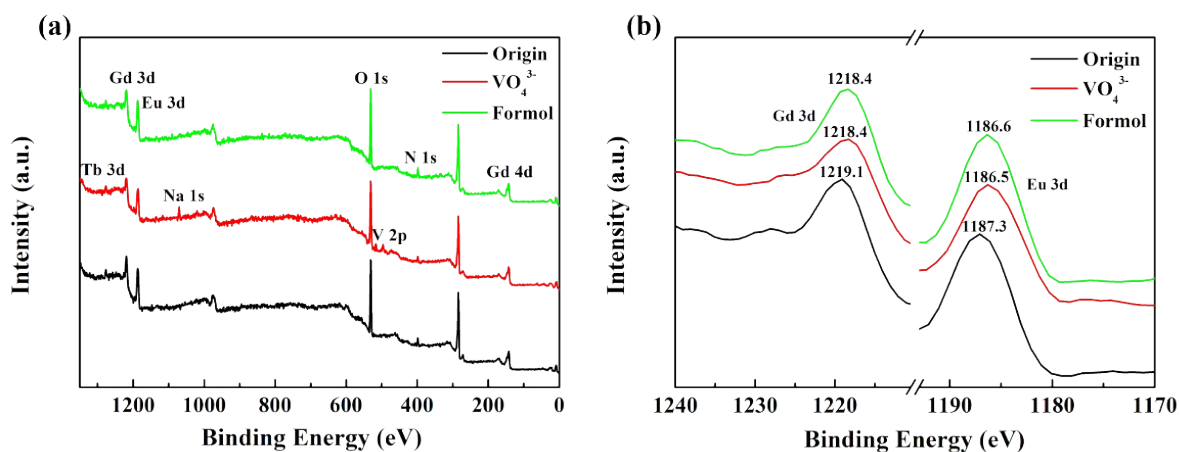

**Figure S12.** (a) XPS spectra and (b) Gd 3d and Eu 3d spectra of original  $\text{Eu}_{0.059}\text{Tb}_{0.051}\text{Gd}_{0.89}\text{-DPON}$  as well as it treated with formol or  $\text{VO}_4^{3-}$ .

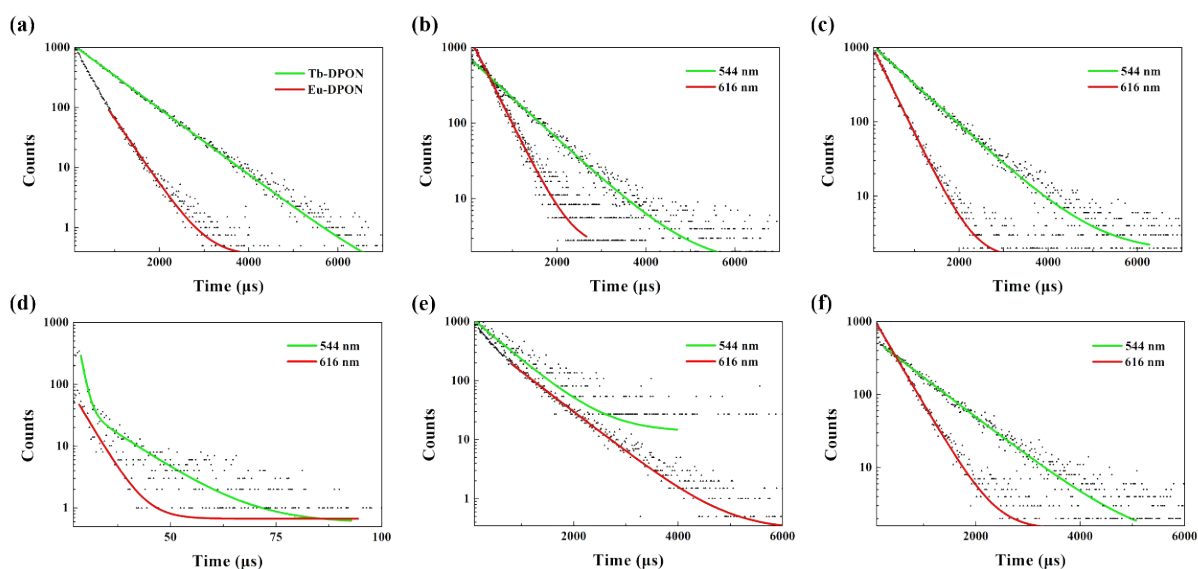

**Figure S13.** The fluorescence lifetimes of (a)  $\text{Eu-DPON}$  and  $\text{Tb-DPON}$ , (b) original  $\text{Eu}_{0.059}\text{Tb}_{0.051}\text{Gd}_{0.89}\text{-DPON}$ , (c)  $\text{Eu}_{0.059}\text{Tb}_{0.051}\text{Gd}_{0.89}\text{-DPON}$  in water, (d)  $\text{Eu}_{0.059}\text{Tb}_{0.051}\text{Gd}_{0.89}\text{-DPON}$  in  $\text{Fe}^{3+}$  aqueous solution, (e)  $\text{Eu}_{0.059}\text{Tb}_{0.051}\text{Gd}_{0.89}\text{-DPON}$  in  $\text{VO}_4^{3-}$  aqueous solution and (f)  $\text{Eu}_{0.059}\text{Tb}_{0.051}\text{Gd}_{0.89}\text{-DPON}$  in formol excited at 340 nm.

**Table S10** The HOMO, LUMO and  $T_1$  energy level of ligand, formol, acetaldehyde and acetone obtained through the DFT calculation at the B3LYP/6-31 G\* level.

| Molecules    | HOMO (eV) | LUMO (eV) | $T_1$ ( $\text{cm}^{-1}$ ) |
|--------------|-----------|-----------|----------------------------|
| Ligand       | -6.96     | -2.34     | 21053                      |
| Formol       | -7.37     | -1.54     | 24109                      |
| Acetaldehyde | -7.00     | -1.08     | 26132                      |
| Acetone      | -6.68     | -0.74     | 27470                      |

**Table S11** Fluorescence lifetimes at 544 nm and 616 nm of **Tb-DPON**, **Eu-DPON** and **Eu<sub>0.059</sub>Tb<sub>0.051</sub>Gd<sub>0.89</sub>-DPON** in various conditions with excitation under 340 nm.

| No.                                                                                              | Fluorescence lifetime at 544 nm (ms) | Fluorescence lifetime at 616 nm (ms) |
|--------------------------------------------------------------------------------------------------|--------------------------------------|--------------------------------------|
| <b>Eu-DPON</b>                                                                                   | --                                   | 0.39581                              |
| <b>Tb-DPON</b>                                                                                   | 0.79073                              | --                                   |
| <b>Eu<sub>0.059</sub>Tb<sub>0.051</sub>Gd<sub>0.89</sub>-DPON</b>                                | 0.80077                              | 0.36240                              |
| <b>Eu<sub>0.059</sub>Tb<sub>0.051</sub>Gd<sub>0.89</sub>-DPON in H<sub>2</sub>O</b>              | 0.79703                              | 0.35298                              |
| <b>Eu<sub>0.059</sub>Tb<sub>0.051</sub>Gd<sub>0.89</sub>-DPON in Fe<sup>3+</sup></b>             | 0.00865                              | 0.00372                              |
| <b>Eu<sub>0.059</sub>Tb<sub>0.051</sub>Gd<sub>0.89</sub>-DPON in VO<sub>4</sub><sup>3-</sup></b> | 0.57791                              | 0.63841                              |
| <b>Eu<sub>0.059</sub>Tb<sub>0.051</sub>Gd<sub>0.89</sub>-DPON in formol</b>                      | 0.79266                              | 0.35372                              |

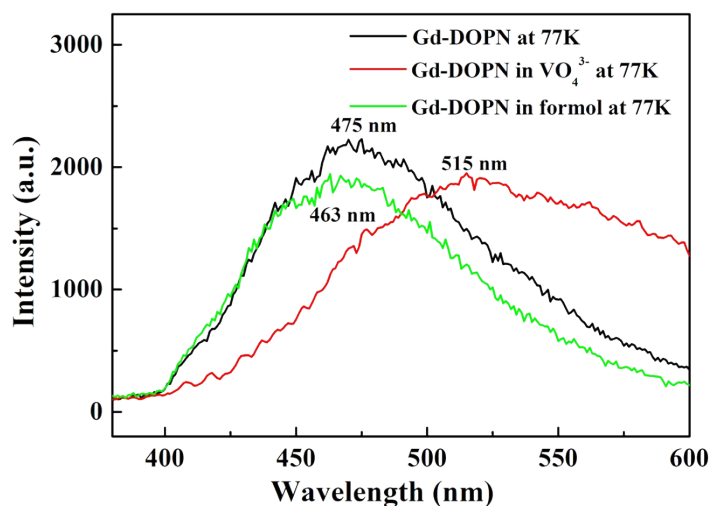

**Figure S14.** The emission spectra of original **Gd<sub>0.89</sub>-DPON** as well as it treated with formol or VO<sub>4</sub><sup>3-</sup> measured at 77K.

## Section 6. The Detection for Formol.

**Table S12** Standard deviation and limit of detection calculation for  $\text{Eu}_{0.059}\text{Tb}_{0.051}\text{Gd}_{0.89}\text{-DPON}$  toward formol.

| No.                                                  | Luminescence Intensity ( $I_{544}$ ) of $\text{Eu}_{0.059}\text{Tb}_{0.051}\text{Gd}_{0.89}\text{-DPON}$ in $\text{H}_2\text{O}$ | $I_0/I-1$                   |
|------------------------------------------------------|----------------------------------------------------------------------------------------------------------------------------------|-----------------------------|
| 1                                                    | 2944.48 a.u.                                                                                                                     | 0                           |
| 2                                                    | 2942.44 a.u.                                                                                                                     | 0.00069                     |
| 3                                                    | 2956.86 a.u.                                                                                                                     | -0.00419                    |
| 4                                                    | 2941.13 a.u.                                                                                                                     | 0.00114                     |
| 5                                                    | 2948.83 a.u.                                                                                                                     | -0.00148                    |
| <b>Standard Deviation (<math>\sigma</math>)</b>      | --                                                                                                                               | 0.002154825                 |
| <b><math>K_{SV}</math></b>                           | --                                                                                                                               | 0.33504 vol % <sup>-1</sup> |
| <b>Detection limit (<math>3\sigma/K_{SV}</math>)</b> | --                                                                                                                               | 0.0193 vol %                |

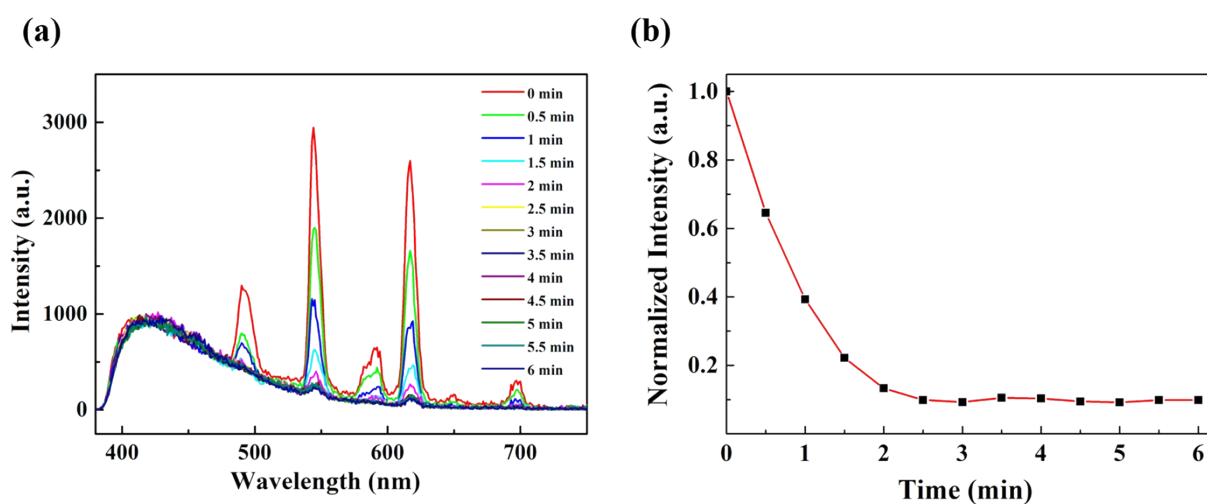

**Figure S15.** The fluorescence quench of  $\text{Eu}_{0.059}\text{Tb}_{0.051}\text{Gd}_{0.89}\text{-DPON}$  in 0-6 minutes after the addition of formol.

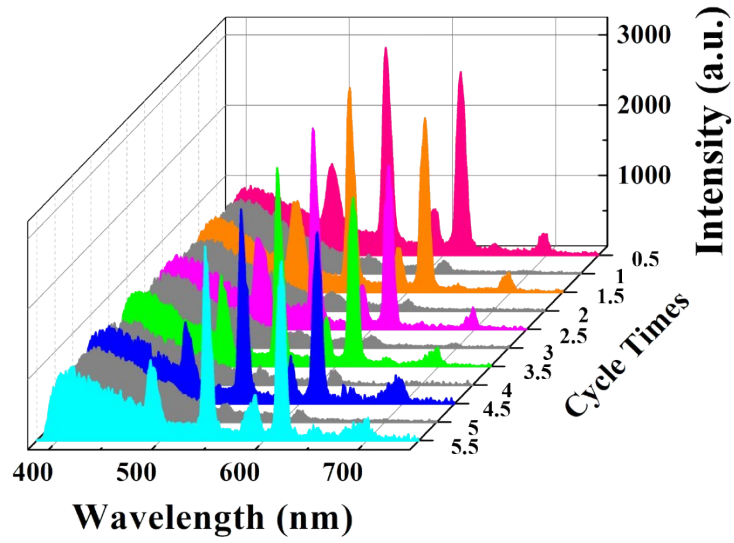

Figure S16. The emission spectra of  $\text{Eu}_{0.059}\text{Tb}_{0.051}\text{Gd}_{0.89}\text{-DPON}$  after five cycles in formol.

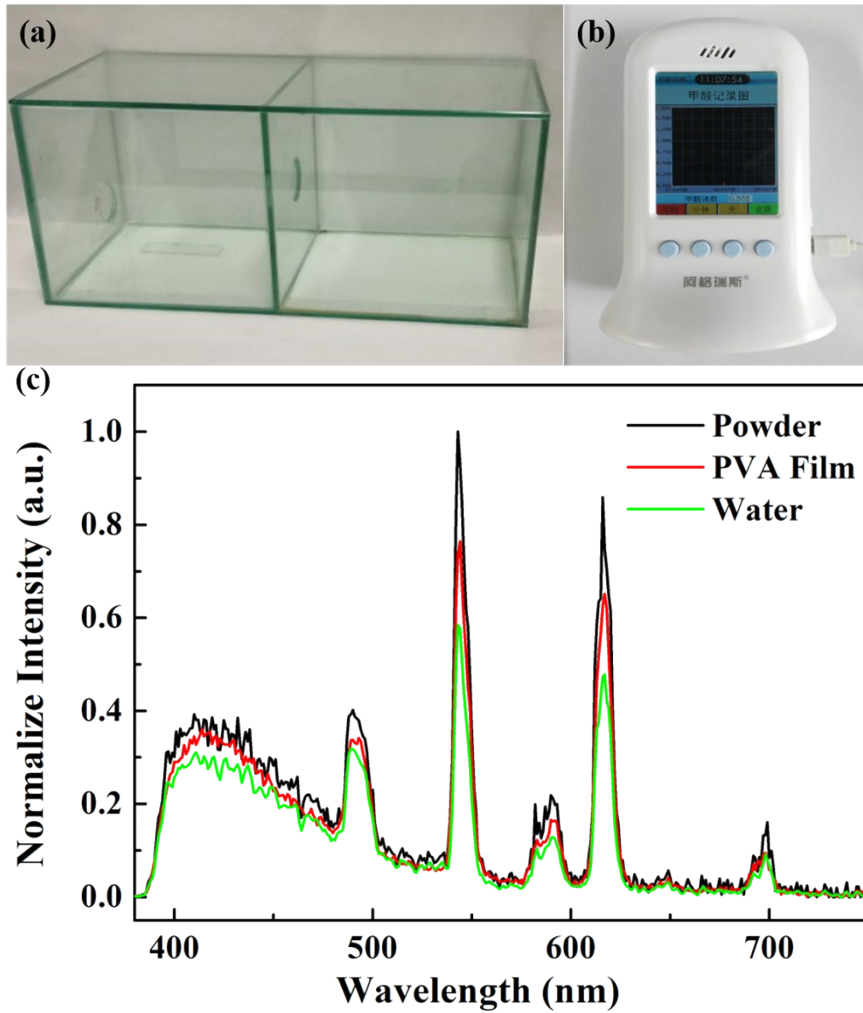

Figure S17. The photo of (a) device, (b) formol detector and (c) The emission spectra of  $\text{Eu}_{0.059}\text{Tb}_{0.051}\text{Gd}_{0.89}\text{-DPON}$  powder,  $\text{Eu}_{0.059}\text{Tb}_{0.051}\text{Gd}_{0.89}\text{-DPON}$  PVA film and  $\text{Eu}_{0.059}\text{Tb}_{0.051}\text{Gd}_{0.89}\text{-DPON}$  in water.

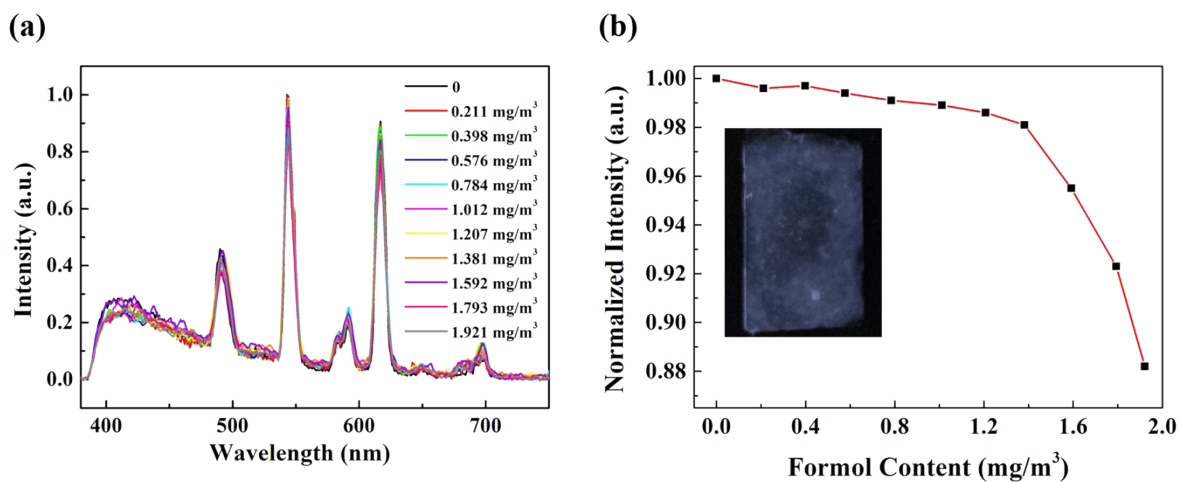

**Figure S18.** The fluorescence quench of  $\text{Eu}_{0.059}\text{Tb}_{0.051}\text{Gd}_{0.89}$ -DPON PVA film toward different concentrations of formol in air, insets show the corresponding photograph.

### Section 7. 3D Decoded Map.

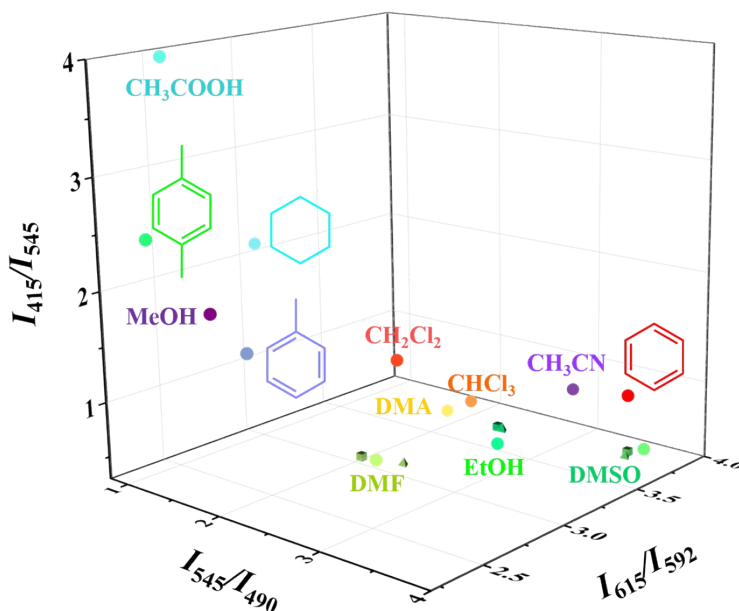

**Figure S19.** The 3D decoded map for various solvent molecules based on the ratios of  $I_{544}/I_{491}$ ,  $I_{616}/I_{592}$  and  $I_{415}/I_{544}$ , the cube represent contents of DMF, DMSO or EtOH is 30 vol % and tetrahedron represent contents of DMF, DMSO or EtOH is 50 vol %.



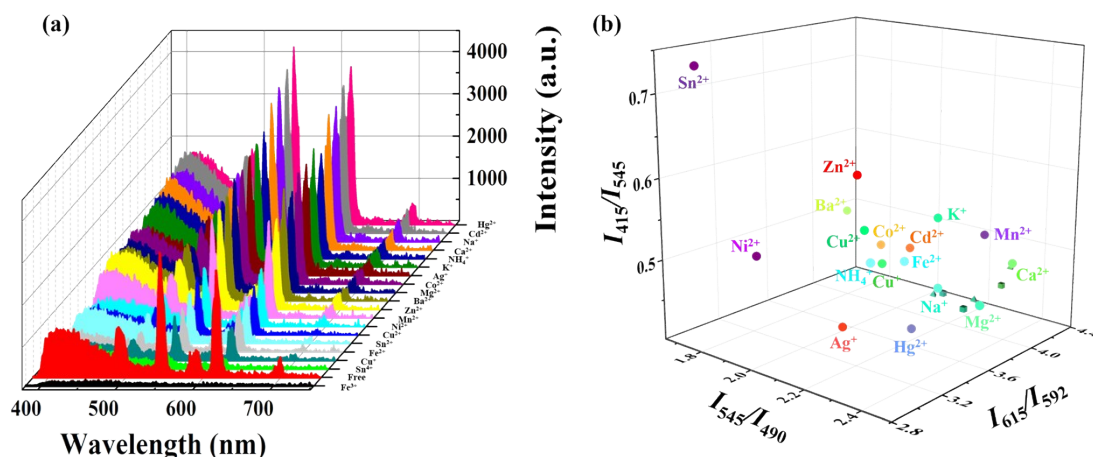

**Figure S20.** (a) Fluorescence response of  $\text{Eu}_{0.059}\text{Tb}_{0.051}\text{Gd}_{0.89}\text{-DPON}$  treated by different metal ions (1 mM aqueous solution for 30 min) excited at 340 nm. (b) The 3D decoded map for various metal ions based on the ratios of  $I_{544}/I_{491}$ ,  $I_{616}/I_{592}$  and  $I_{415}/I_{544}$ , the cube represent concentrations of  $\text{Na}^+$ ,  $\text{Ca}^{2+}$  or  $\text{Mg}^{2+}$  is 0.5 mM and tetrahedron represent contents of  $\text{Na}^+$ ,  $\text{Ca}^{2+}$  or  $\text{Mg}^{2+}$  is 5 mM.

## Section 8. The Detection for $\text{VO}_4^{3-}$ .

**Table S13** Standard deviation and limit of detection calculation for  $\text{Eu}_{0.059}\text{Tb}_{0.051}\text{Gd}_{0.89}\text{-DPON}$  toward  $\text{VO}_4^{3-}$ .

| No.                                             | Luminescence Intensity ( $I_{544}$ ) of $\text{Eu}_{0.059}\text{Tb}_{0.051}\text{Gd}_{0.89}\text{-DPON}$ in $\text{H}_2\text{O}$ | Luminescence Intensity ( $I_{616}$ ) of $\text{Eu}_{0.059}\text{Tb}_{0.051}\text{Gd}_{0.89}\text{-DPON}$ in $\text{H}_2\text{O}$ | $I_{616}/I_{544}$        |
|-------------------------------------------------|----------------------------------------------------------------------------------------------------------------------------------|----------------------------------------------------------------------------------------------------------------------------------|--------------------------|
| 1                                               | 2944.48 a.u.                                                                                                                     | 2528.40 a.u.                                                                                                                     | 0.858692                 |
| 2                                               | 2942.44 a.u.                                                                                                                     | 2523.37 a.u.                                                                                                                     | 0.857577                 |
| 3                                               | 2956.86 a.u.                                                                                                                     | 2536.63 a.u.                                                                                                                     | 0.857880                 |
| 4                                               | 2941.13 a.u.                                                                                                                     | 2525.19 a.u.                                                                                                                     | 0.858578                 |
| 5                                               | 2948.83 a.u.                                                                                                                     | 2533.28 a.u.                                                                                                                     | 0.859080                 |
| <b>Standard Deviation (<math>\sigma</math>)</b> | --                                                                                                                               | --                                                                                                                               | 0.000640298              |
| <b>Slope (<math>S</math>)</b>                   | --                                                                                                                               | --                                                                                                                               | 4.55968 $\text{mM}^{-1}$ |
| <b>Detection limit (<math>3\sigma/S</math>)</b> | --                                                                                                                               | --                                                                                                                               | 0.42 $\mu\text{M}$       |

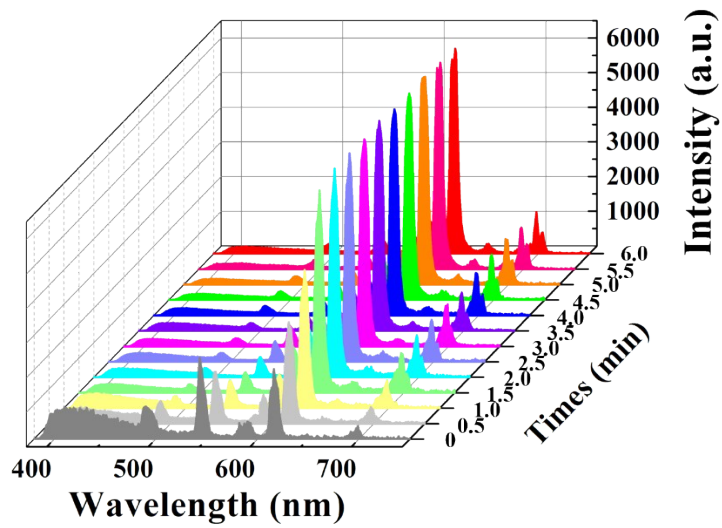

**Figure S21.** The emission spectra of  $\text{Eu}_{0.059}\text{Tb}_{0.051}\text{Gd}_{0.89}\text{-DPON}$  in 0-6 minutes after the addition of  $\text{Na}_3\text{VO}_4$ .

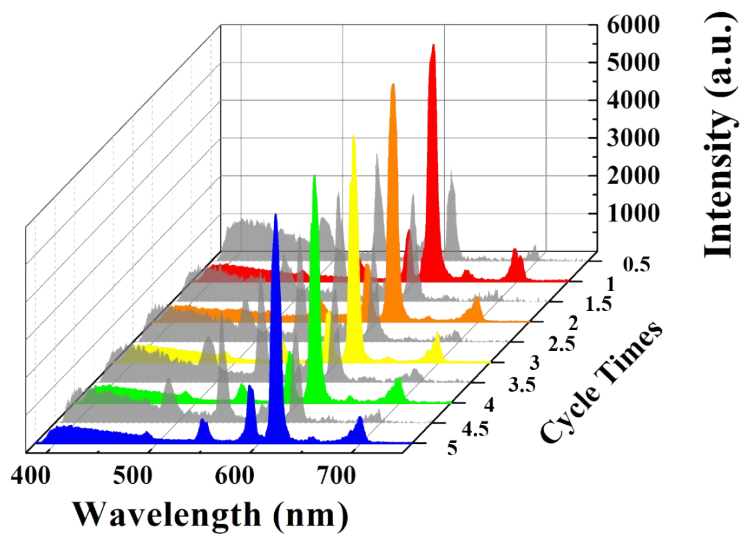

**Figure S22.** The emission spectra of  $\text{Eu}_{0.059}\text{Tb}_{0.051}\text{Gd}_{0.89}\text{-DPON}$  after five cycles in  $\text{Na}_3\text{VO}_4$ .

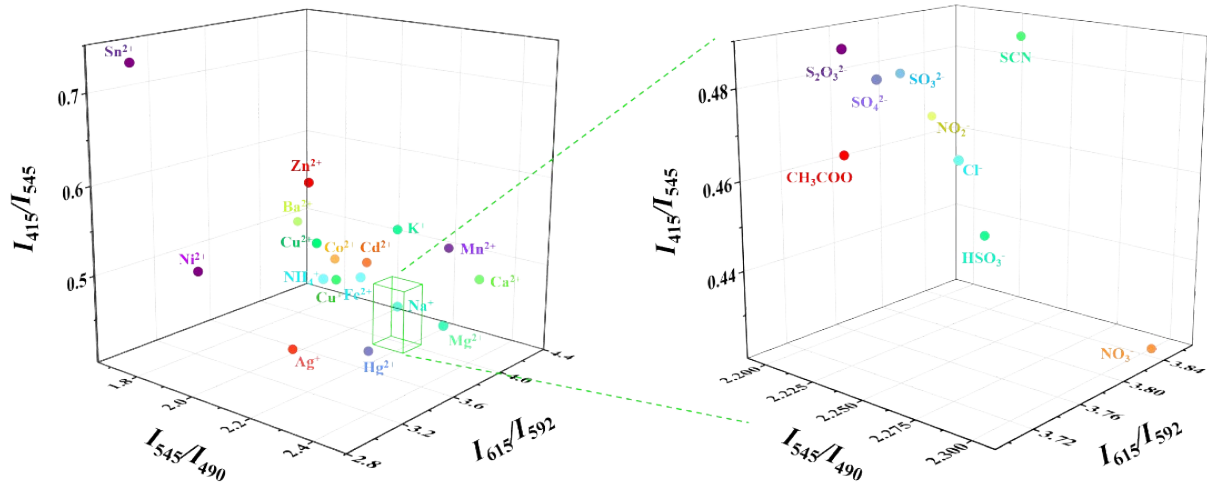

Figure S23. The 3-D decoded map for various anions.

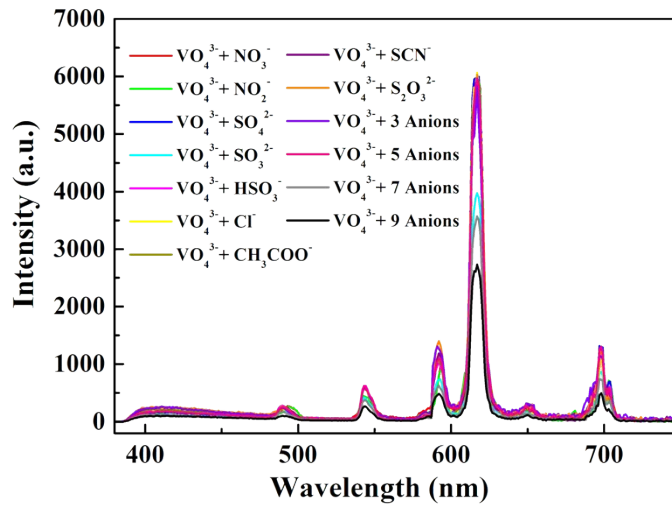

Figure S24. The emission spectra of  $\text{Eu}_{0.059}\text{Tb}_{0.051}\text{Gd}_{0.89}$ -DPON with one or more interfering anions.

## Section 9. Boolean logic operation.

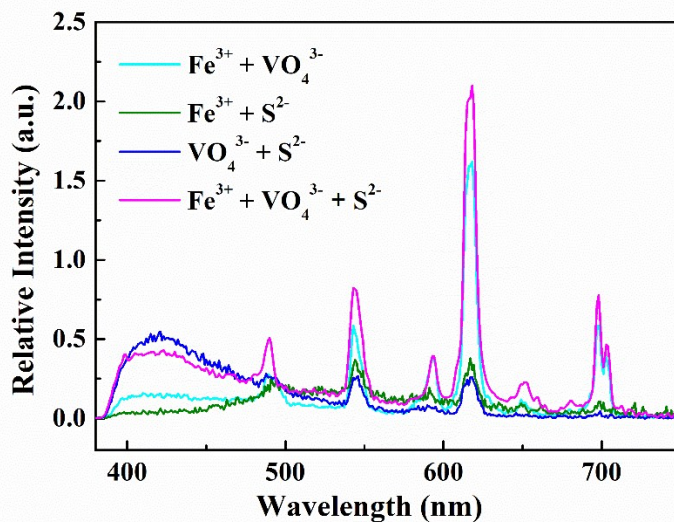

Figure S25. The emission spectra of  $\text{Eu}_{0.059}\text{Tb}_{0.051}\text{Gd}_{0.89}$ -DPON with double or three inputs.

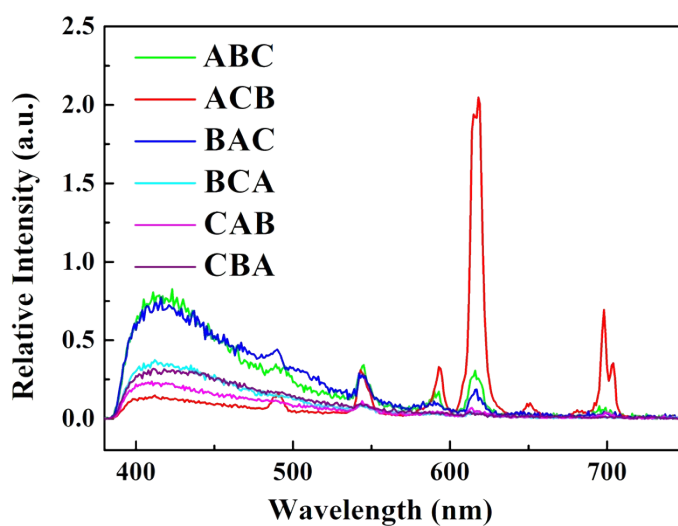

Figure S26. The emission spectra of  $\text{Eu}_{0.059}\text{Tb}_{0.051}\text{Gd}_{0.89}$ -DPON with different sequences of three inputs.
